# Supplementary material for: Biological Evaluation of Photodynamic Effect Mediated by Nanoparticles with Embedded Porphyrin Photosensitizer
Source: MDPI journal article supplement (doi:10.3390/ijms23073588), 2022-03-25
Supplement: s1 [file s1]

## SUPPORTING INFORMATION

### **Biological Evaluation of Photodynamic Effect Mediated by Nanoparticles with Embedded Porphyrin Photosensitizer**

Ludmila Žárská<sup>1</sup>, Zuzana Malá<sup>1</sup>, Kateřina Langová<sup>1</sup>, Lukáš Malina<sup>1</sup>, Svatopluk Binder<sup>1</sup>, Robert Bajgar<sup>1,2</sup>, Petr Henke<sup>3</sup>, Jiří Mosinger<sup>3</sup>, Hana Kolářová<sup>1\*</sup>

<sup>1</sup>*Department of Medical Biophysics, Faculty of Medicine and Dentistry, Palacky University in Olomouc, Hnevotinska 3, 775 15 Olomouc, Czech Republic*

<sup>2</sup>*Institute of Molecular and Translation Medicine, Faculty of Medicine and Dentistry, Palacky University in Olomouc, Hnevotinska 5, 775 15 Olomouc, Czech Republic*

<sup>3</sup>*Department of Inorganic Chemistry, Faculty of Science, Charles University, Hlavova 2030, 12843 Prague 2, Czech Republic*

**\* Corresponding Author:** *hana.kolarova@upol.cz*

#### **Content**

Figure S1: Normalized UV-Vis spectra of TPP-NP and TPP

Figure S2. Normalized fluorescence spectra of TPP-NP and TPP

Absorption spectra of TPP encapsulated in polystyrene matrix of nanoparticles are almost identical to the absorption spectrum of TPP in toluene. There is a small contribution of the protonated form of TPP (Protonated form has redshifted the Soret band from 420 to 440 nm) (Figure S1), which is better visible from emission spectra where a new band of the protonated form (680 nm) is clearly visible between two bands of the non-protonated form (650 and 717 nm) (Figure S2). UV-Vis absorption spectra were recorded on Varian 4000 spectrometer equipped with an integration sphere. Steady-state fluorescence spectra were monitored on an FLS 980 spectrofluorometer (Edinburgh Instruments).

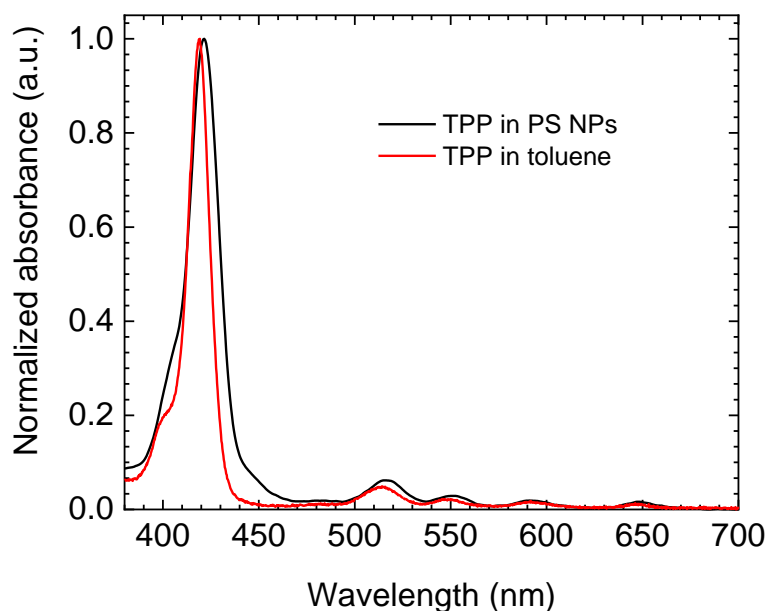

Figure S3: Normalized UV-Vis spectra of **TPP-NPs** in water and TPP dissolved in toluene

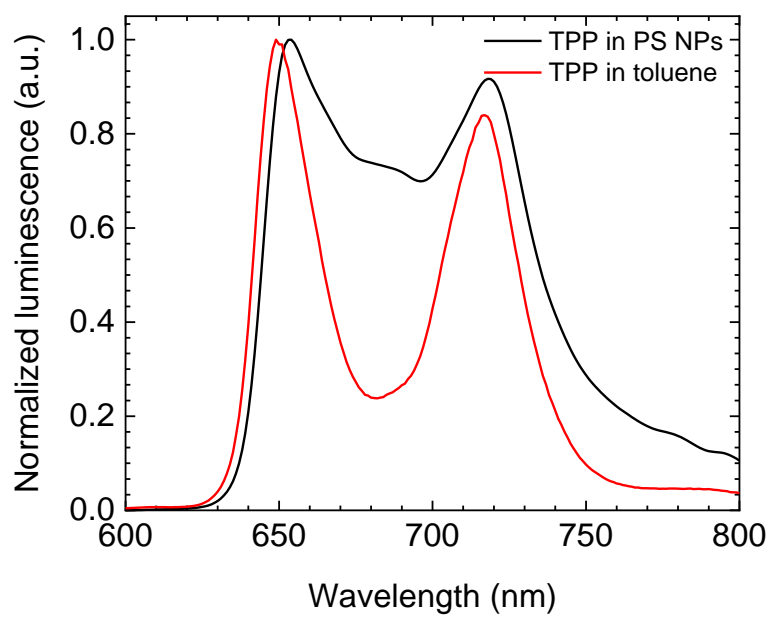

Figure S4. Normalized fluorescence spectra of TPP-NPs suspensions and TPP dissolved in toluene. Excitation at  $\lambda_{exc} = 516$  nm.
